# Supplementary material for: Evidence for Complex Formation of the Bacillus cereus Haemolysin BL Components in Solution
Source: PubMed Central journal article supplement (PMC5618221; doi:10.3390/toxins9090288), 2017-09-16
Supplement: toxins-09-00288-s001.pdf [file toxins-09-00288-s001.pdf]

# Supplementary Materials: Evidence for Complex Formation of the *Bacillus cereus* Haemolysin BL Components in Solution

Franziska Tausch, Richard Dietrich, Kristina Schauer, Robert Janowski, Dierk Niessing, Erwin Märtlbauer and Nadja Jessberger

**Table S1.** Characteristics of the established hybridoma cell lines and mAbs.

| fusion | cell line | Ig subtype        | target            | productivity<br>(reciprocal<br>antibody titre) | relative affinity <sup>a</sup><br>B4ac supernatant | rHbl<br>components |
|--------|-----------|-------------------|-------------------|------------------------------------------------|----------------------------------------------------|--------------------|
| I      | 1B3       | IgG <sub>1</sub>  | Hbl B             | 7000                                           | 60                                                 | 800                |
| I      | 1C10      | IgG <sub>1</sub>  | Hbl B             | 15400                                          | 140                                                | 760                |
| I      | 1C11      | IgG <sub>2b</sub> | Hbl B             | 16200                                          | 50                                                 | 450                |
| I      | 1D12      | IgG <sub>2a</sub> | Hbl B             | 13900                                          | 100                                                | 480                |
| I      | 1E7       | IgG <sub>1</sub>  | Hbl B             | 6300                                           | 120                                                | 620                |
| I      | 1E8       | -                 | Hbl B             | 70                                             | 30                                                 | 100                |
| I      | 1K9       | IgG <sub>1</sub>  | Hbl B             | 6000                                           | 80                                                 | 490                |
| I      | 2G4       | IgG <sub>1</sub>  | Hbl B             | 12700                                          | 120                                                | 690                |
| I      | 2H7       | IgM               | Hbl B             | 3400                                           | 80                                                 | 540                |
| I      | 11A5      | IgG <sub>1</sub>  | Hbl B             | 9000                                           | 170                                                | 900                |
| I      | 1G8       | IgG <sub>1</sub>  | Hbl B / Hbl<br>L1 | 850                                            | 130                                                | 900 / 610          |
| I      | 11H5      | IgG <sub>1</sub>  | Hbl B / Hbl<br>L1 | 20500                                          | 230                                                | 410 / 680          |
| I      | 12D9      | IgG <sub>1</sub>  | Hbl B / Hbl<br>L1 | >21900                                         | 340                                                | 580 / 890          |
| I      | 12D12     | IgG <sub>2a</sub> | Hbl B / Hbl<br>L1 | 15900                                          | 70                                                 | 180 / 440          |
| II     | 1B10      | IgG <sub>1</sub>  | Hbl B             | 580                                            | 30                                                 | <10                |
| II     | 1D7       | IgG <sub>1</sub>  | Hbl B             | 6300                                           | 110                                                | 270                |
| II     | 1D9       | -                 | Hbl B             | 250                                            | 60                                                 | 310                |
| II     | 1E1       | IgG <sub>2b</sub> | Hbl B             | 6400                                           | 40                                                 | 330                |
| II     | 1E4       | -                 | Hbl B             | 2900                                           | 60                                                 | 370                |
| II     | 1E5       | -                 | Hbl B             | 6700                                           | 60                                                 | 200                |
| II     | 1E7       | -                 | Hbl B             | 3500                                           | 50                                                 | 250                |
| II     | 1F6       | IgG <sub>1</sub>  | Hbl B             | 1800                                           | 30                                                 | 370                |
| II     | 2H3       | IgG <sub>1</sub>  | Hbl B             | 720                                            | 20                                                 | 390                |
| II     | 1D8       | IgG <sub>2a</sub> | Hbl L2            | 4800                                           | 580                                                | 4700               |
| III    | 1A10      | IgG <sub>1</sub>  | Hbl B             | 80                                             | 20                                                 | <10                |
| III    | 1B10      | -                 | Hbl B             | 600                                            | 80                                                 | 130                |
| III    | 1C9       | -                 | Hbl B             | 13700                                          | 40                                                 | 360                |
| III    | 1C12      | IgG <sub>2b</sub> | Hbl B             | 1400                                           | 60                                                 | 140                |
| III    | 1E2       | IgG <sub>1</sub>  | Hbl B             | >21900                                         | 60                                                 | 780                |
| III    | 1E10      | IgG <sub>1</sub>  | Hbl B             | >21900                                         | 80                                                 | 390                |
| III    | 1F9       | IgG <sub>1</sub>  | Hbl B             | 4000                                           | 60                                                 | 270                |
| III    | 1H1       | -                 | Hbl B             | 17900                                          | 80                                                 | 550                |
| III    | 2G10      | IgG <sub>1</sub>  | Hbl B             | 18400                                          | 90                                                 | 580                |
| III    | 2H10      | IgG <sub>1</sub>  | Hbl B             | >21900                                         | 20                                                 | 230                |
| III    | 1H9       | IgG <sub>1</sub>  | Hbl L2            | 820                                            | 1500                                               | 8400               |

<sup>a</sup> : Reciprocal titre in indirect EIAs.

- : No distinct Ig isotyping results.

**Table S2.** Statistics of the curves fitted to the EIA and SPR experiments. Analyses of EIA data were performed using GraphPad Prism Version 5.04 for Windows, GraphPad Software, San Diego California USA, www.graphpad.com. Correlation coefficients and the type of equation used are shown. For the SPR experiments (Figure 5) a one-site binding model was used and the statistical value  $\chi^2$  was calculated with BIAevaluation program.

| graph                                                  |                                | equation type<br>non-linear regression | R <sup>2</sup> |
|--------------------------------------------------------|--------------------------------|----------------------------------------|----------------|
| Figure 3B                                              |                                |                                        |                |
| L <sub>1</sub> - B - mAb 1B8                           |                                | saturation binding curve               | 0.9723         |
| L <sub>1</sub> - L <sub>2</sub> - mAb 1H9              |                                | saturation binding curve               | 0.9505         |
| Figure 4A                                              |                                |                                        |                |
| mAb 1E9 - L <sub>1</sub> +B - mAb 1B8-HRP              | L <sub>1</sub> +B              | saturation binding curve               | 0.9997         |
|                                                        | L <sub>1</sub>                 | saturation binding curve               | 0.8337         |
|                                                        | B                              | saturation binding curve               | 0.6166         |
| mAb 1G8 - L <sub>1</sub> +L <sub>2</sub> - mAb 1H9-HRP | L <sub>1</sub> +L <sub>2</sub> | saturation binding curve               | 0.9909         |
|                                                        | L <sub>1</sub>                 | saturation binding curve               | 0.9424         |
|                                                        | L <sub>2</sub>                 | saturation binding curve               | 0.4649         |
| Figure 4B                                              |                                |                                        |                |
| mAb 1E9 - L <sub>1</sub> +B - mAb 1B8-HRP              | 1:1                            | one phase decay                        | 0.9707         |
|                                                        | 5:1                            | one phase decay                        | 0.9883         |
|                                                        | 10:1                           | one phase decay                        | 0.9750         |
|                                                        | 1:5                            | one phase decay                        | 0.9359         |
|                                                        | 1:10                           | one phase decay                        | 0.9478         |
| mAb 1G8 - L <sub>1</sub> +L <sub>2</sub> - mAb 1H9-HRP | 1:1                            | one phase decay                        | 0.9853         |
|                                                        | 5:1                            | one phase decay                        | 0.9859         |
|                                                        | 10:1                           | one phase decay                        | 0.9814         |
|                                                        | 1:5                            | one phase decay                        | 0.9835         |
|                                                        | 1:10                           | one phase decay                        | 0.9874         |
| Figure 5                                               |                                |                                        |                |
| A. L <sub>1</sub> + L <sub>2</sub>                     |                                | one-site binding model                 | 8.06           |
| B. L <sub>1</sub> + B                                  |                                | one-site binding model                 | 3.49           |
| C. B + L <sub>2</sub>                                  |                                | one-site binding model                 | 4.48           |
| Figure 6                                               |                                |                                        |                |
| A. mAb 1E9 - supernatant - mAb 1B8-HRP                 |                                | one phase decay                        | 0.9842         |
| B. mAb 1G8 - supernatant - mAb 1H9-HRP                 |                                | one phase decay                        | 0.9526         |
| C. mAb 1H9 - supernatant - mAb 1G8-HRP                 |                                | one phase decay                        | 0.9221         |

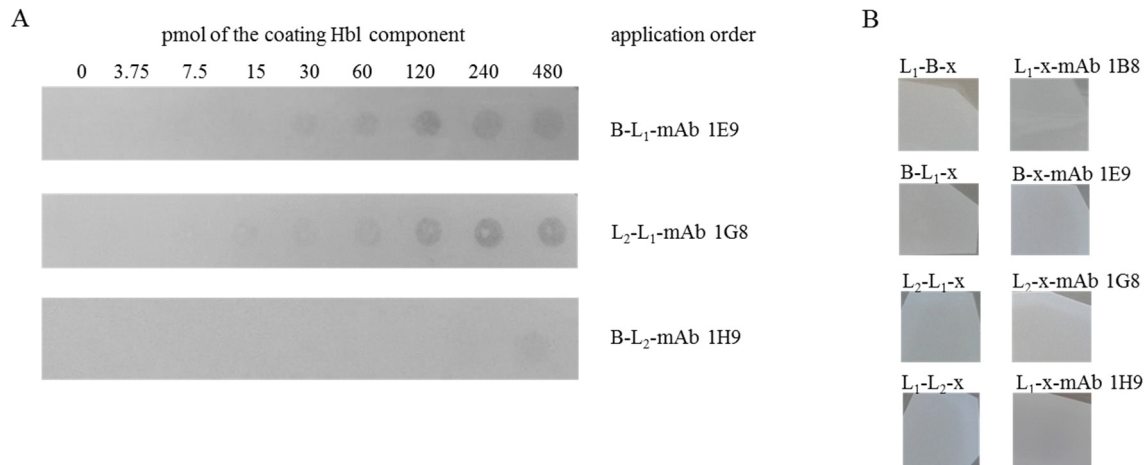

**Figure S1.** Detection of Hbl complex formation via Dot blot. **A.** The first rHbl component was applied to the PVDF membrane in rising concentrations (3.75 - 480 pmol). After blocking, the membrane was incubated in PBS with the second component (30 pmol). Proteins were detected using the specific mAbs 1E9 (Hbl L<sub>1</sub>) [1], 1G8 (Hbl L<sub>1</sub>) (this study) and 1H9 (Hbl L<sub>2</sub>) (this study) and a goat anti mouse-alkaline phosphatase conjugate. **B.** Negative controls showed the specificity of the reaction.

## References

1. Wehrle, E.; Moravek, M.; Dietrich, R.; Bürk, C.; Didier, A.; Märtlbauer, E. Comparison of multiplex PCR, enzyme immunoassay and cell culture methods for the detection of enterotoxinogenic *Bacillus cereus*. *J. Microbiol. Methods* **2009**, *78*, 265–270. doi:10.1016/j.mimet.2009.06.013.
